# Supplementary material for: Detecting epigenetic motifs in low coverage and metagenomics settings
Source: PubMed Central journal article supplement (PMC4168715; doi:10.1186/1471-2105-15-s9-s16), 2014-09-10
Supplement: 1471-2105-15-S9-S16-S1.pdf [file 1471-2105-15-S9-S16-S1.pdf]

## Supplementary materials

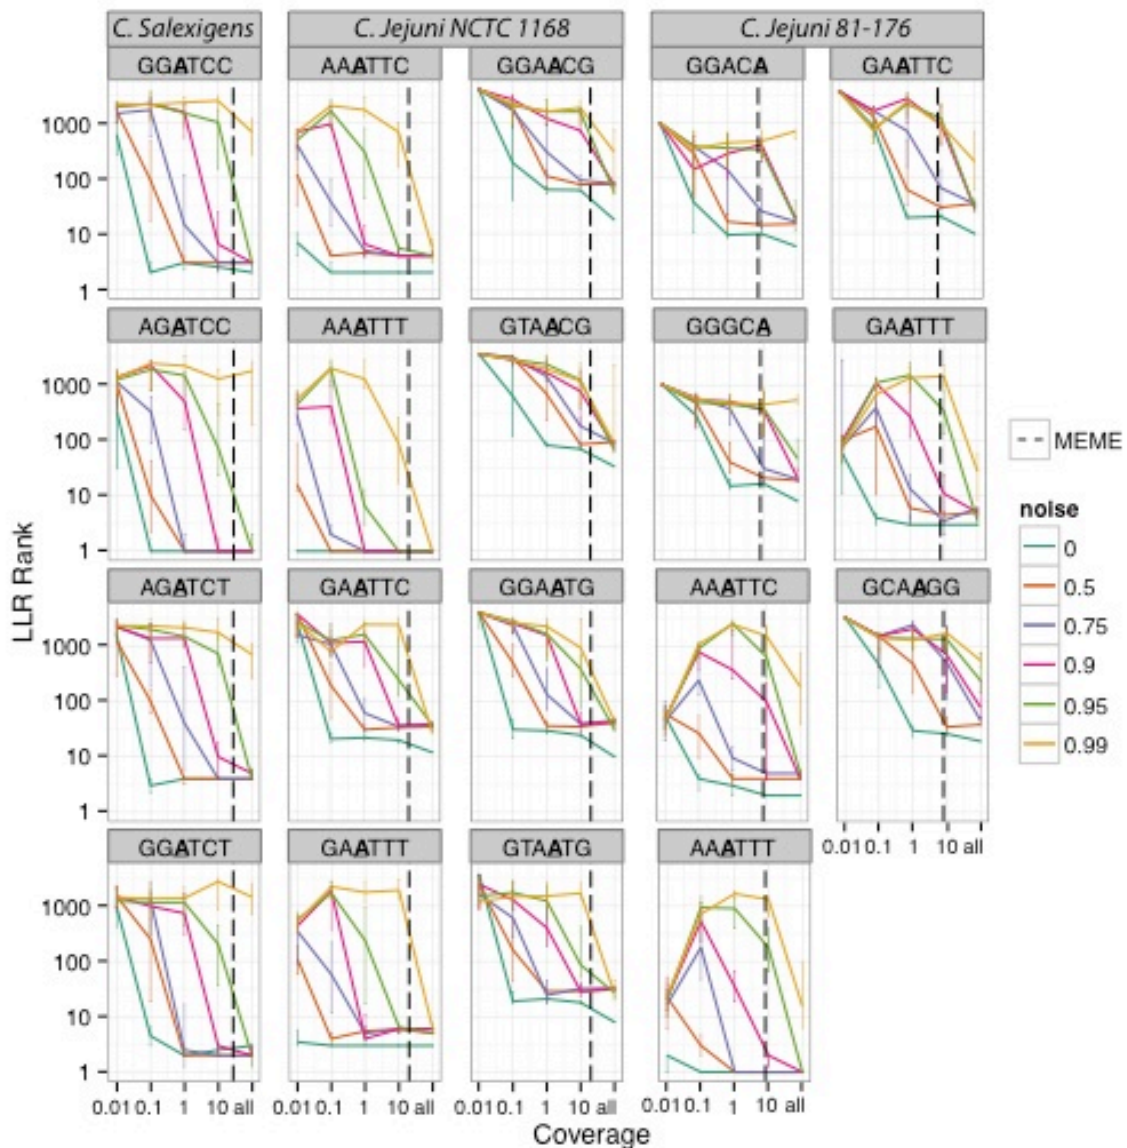

### Supplemental Figure 1 - LLR ranking of true Kmers

Each kmer is ranked by its LLR score for multiple coverages and levels of “noise” (colors). The x-axis represents the coverage after downsampling (where “all” represents the entire dataset) and the y-axis the rank of the associated LLR value. Each point represents the median of 10 simulations, with upper and lower quartile bounds given by error-bars. Vertical black dashed lines correspond to the lowest coverage in which a majority of MEME runs (5 iterations) detect *any* true motif for the corresponding genome. The modified position per kmer is highlighted in each subplot title. All 5-mer true motifs and their children have been eliminated prior to running the 6-mer simulations.

**Supplemental Table 1 – Run time and Memory Analysis**

| Input Dataset             | Total Used |        | IPDs  | LLR Kmer   |        | Table    | Significant Motif |  |
|---------------------------|------------|--------|-------|------------|--------|----------|-------------------|--|
|                           | (Millions) |        |       | Generation | time   |          | Assignment        |  |
|                           | WGA        | Native |       | CPU time   | Memory | CPU      | Memory            |  |
|                           |            |        | (hrs) | (hrs)      | (Mb)   | time (s) | (Mb)              |  |
| <i>E. coli</i>            | 221        | 345    |       | 2.89       | 37,641 | 41       | 115               |  |
| <i>C. salexigens</i>      | 354        | 351    |       | 2.96       | 41,181 | 29       | 117               |  |
| <i>G. metallireducens</i> | 264        | 160    |       | 2.24       | 29,024 | 40       | 118               |  |
| <i>B. cereus</i>          | 300        | 268    |       | 3.05       | 39,381 | <1       | 28                |  |
| <i>C. jejuni NCTC</i>     | 331        | 346    |       | 2.19       | 44,484 | 2        | 53                |  |
| <i>C. jejuni 81-176</i>   | 339        | 201    |       | 1.87       | 30,764 | 14       | 113               |  |
| <i>Metagenomics</i>       | 78-102     | 78-102 |       | 4.47       | 54,331 | 30       | 114               |  |
| <i>Simulation (Avg.)</i>  |            |        |       |            |        |          |                   |  |

Memory and run time analysis for various stages of the pipeline. Alignment of sequencing data and conversion from PacBio cmp.h5 format are not included in analysis, since raw sequencing input files were unavailable from some studies.
